# Supplementary material
Source: HighWire-hosted journal article supplement (https://emj.bmj.com/content/37/3/119)

Calibration plot showing the agreement between the predicted probabilities of PredAHT-2 and the

observed outcomes

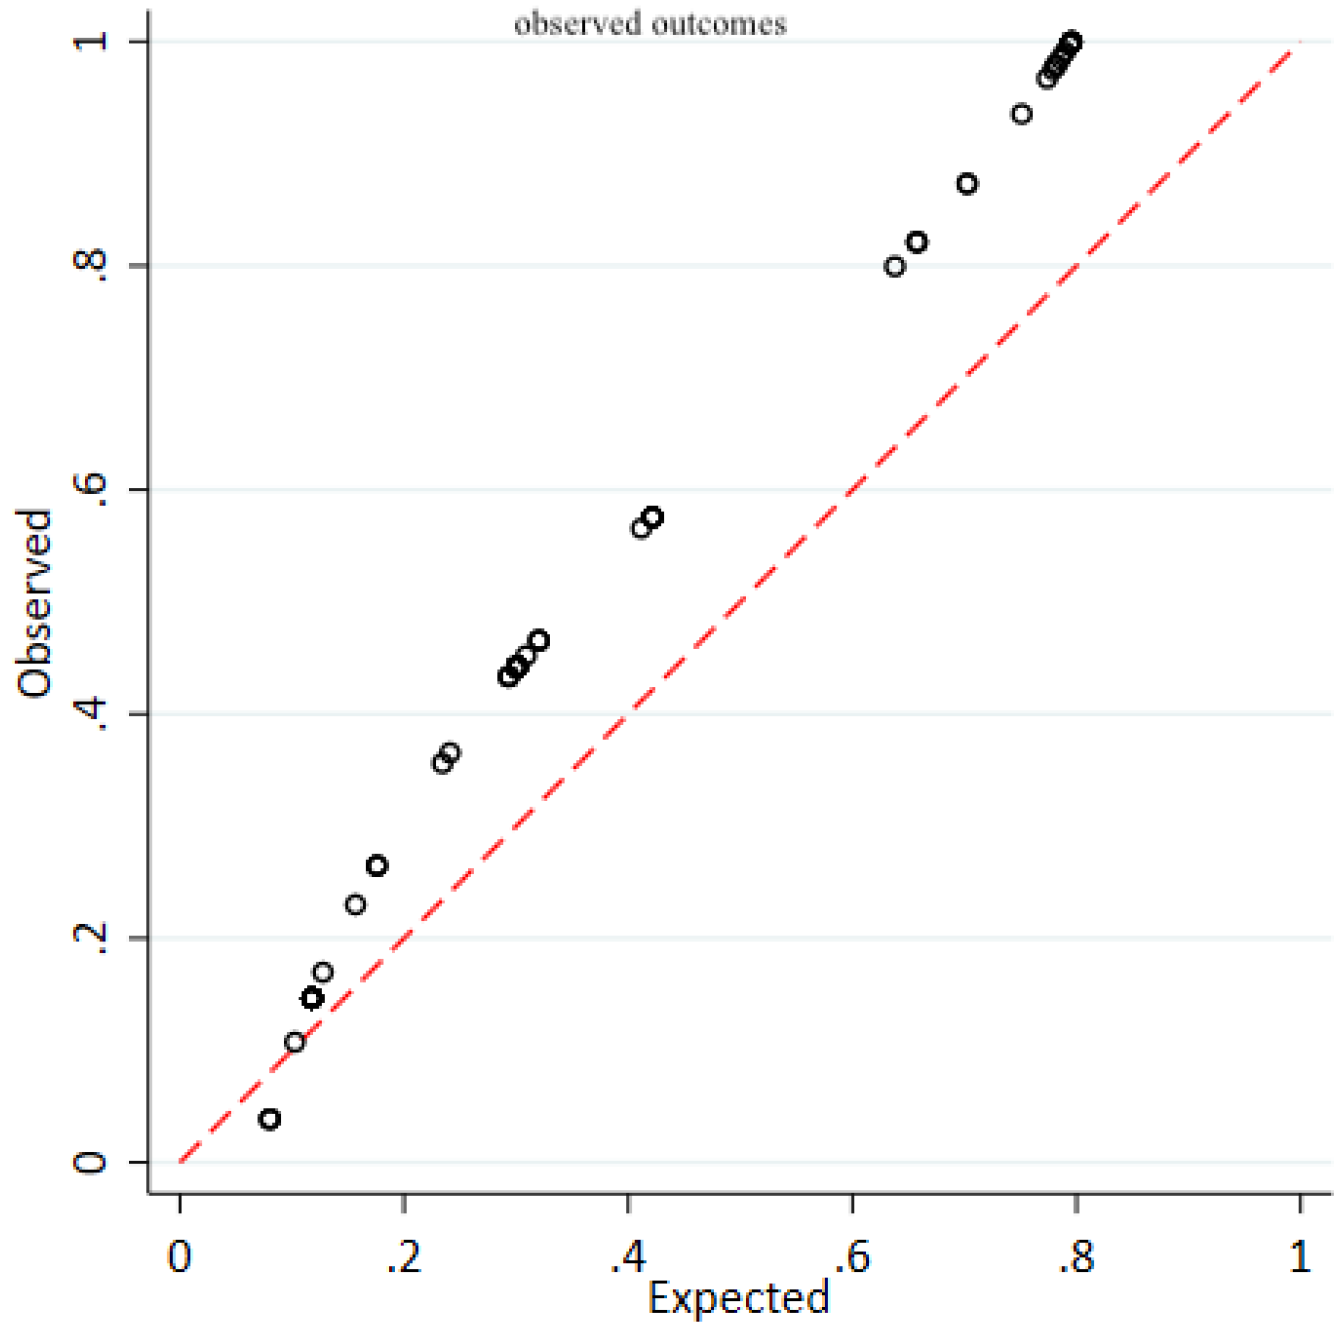

Supplement: inline-supplementary-material-2 [file inline-supplementary-material-2.pdf]
